# Supplementary material
Source: publisher figshare collection journal article supplement (https://gsajournals.figshare.com/ndownloader/files/26754089)
Supplement: Supplementary file 1 [file 26754089]

## Sheet: Sheet1
Table S1 Primers for Sanger sequencing.
Orientation	Length	Tm	GC%	Sequence	Product size
FW-SNP1	20	57.5	40	CTGATCCATGAAAACGGATT	446
RV-SNP1	18	57.4	50	CGAGGATTTCCTGCTGAA
FW-SNP2	20	57.6	50	ATGTACTCCCGATTGCTGAC	454
RV-QTV2	20	57.4	45	AGACAATTTCCCGCTCAGTA
